# Supplementary material for: H-Ferritin Produced by Myeloid Cells Is Released to the Circulation and Plays a Major Role in Liver Iron Distribution during Infection
Source: MDPI journal article supplement (doi:10.3390/ijms23010269), 2021-12-27
Supplement: s1 [file s1]

## H-ferritin produced by myeloid cells is released to the circulation and plays a major role in liver iron distribution during infection

Ana C. Moreira <sup>1,2,3,†</sup>, Tânia Silva <sup>1,2,3,†</sup>, Gonçalo Mesquita <sup>2,‡</sup>, Ana Cordeiro Gomes <sup>1,2</sup>, Clara M. Bento <sup>1,2,4</sup>, João V. Neves <sup>1,2,3</sup>, Daniela F. Rodrigues <sup>1,2</sup>, Pedro N. Rodrigues <sup>1,2,3</sup>, Agostinho A. Almeida <sup>5</sup>, Paolo Santambrogio <sup>6</sup> and Maria Salomé Gomes <sup>1,2,3,\*</sup>

<sup>1</sup> i3S—Instituto de Investigação e Inovação em Saúde, Universidade do Porto, 4200-135 Porto, Portugal; Ana.S.Moreira@ibmc.up.pt (A.C.M.); tania.silva@ibmc.up.pt (T.S.); ana.c.gomes@i3s.up.pt (A.C.G.); clara.bento@i3s.up.pt (C.M.B.); jneves@ibmc.up.pt (J.V.N.); drodrigues@ibmc.up.pt (D.F.R.); prodrigu@ibmc.up.pt (P.N.R.)

<sup>2</sup> IBMC—Instituto de Biologia Molecular e Celular, Universidade do Porto, 4200-135 Porto, Portugal; goncalo.mesquita@univ-lille.fr

<sup>3</sup> ICBAS—Instituto de Ciências Biomédicas Abel Salazar, Universidade do Porto, 4050-313 Porto, Portugal

<sup>4</sup> Programa Doutoral em Biologia Molecular e Celular (MCbiology), Instituto de Ciências Biomédicas Abel Salazar da Universidade do Porto, 4200-135 Porto, Portugal

<sup>5</sup> LAQV/REQUIMTE, Departamento de Ciências Químicas, Faculdade de Farmácia, Universidade do Porto, 4050-313 Porto, Portugal; aalmeida@ff.up.pt

<sup>6</sup> Division of Neuroscience, San Raffaele Scientific Institute, 20132 Milan, Italy; santambrogio.paolo@hsr.it

\* Correspondence: sgomes@ibmc.up.pt

† These authors contributed equally to this work.

‡ Current address: Laboratory of Cell Physiology, INSERM U1003, Laboratory of Excellence Ion Channels Science and Therapeutics, Department of Biology, Faculty of Science and Technologies, University of Lille, 59650 Villeneuve d'Ascq, France; PHYCELL-Laboratoire de Physiologie Cellulaire, INSERM U1003, University of Lille, 59655 Villeneuve d'Ascq, France.

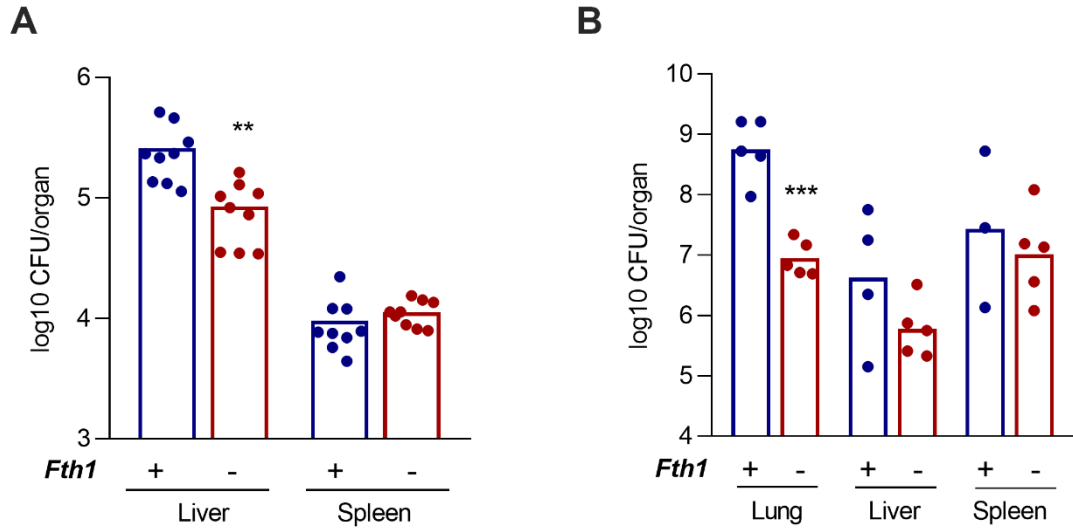

**Figure S1.** Mice deficient in H-ferritin in the myeloid cells are more resistant in different models of *M. avium* infection. (a) *Fth1*<sup>+/+</sup> (blue) and *Fth1*<sup>-/-</sup> (red) mice were intravenously infected with 10<sup>6</sup> CFU of *M. avium* 2447 SmT. Bacterial burden in the liver and spleen, 60 days post infection (N=9). (b) *Fth1*<sup>+/+</sup> (blue) and *Fth1*<sup>-/-</sup> (red) mice were infected via aerosol with a low dose (~100 CFU/lung) of *M. avium* 25291. Bacterial burden in the lung, liver and spleen, 125 days post infection. (N=4 to 5). Bars represent the mean and the circles represent each animal. Statistics: multiple t-test. \*\*P<0.01, \*\*\*P<0.001 when comparing between genotypes.

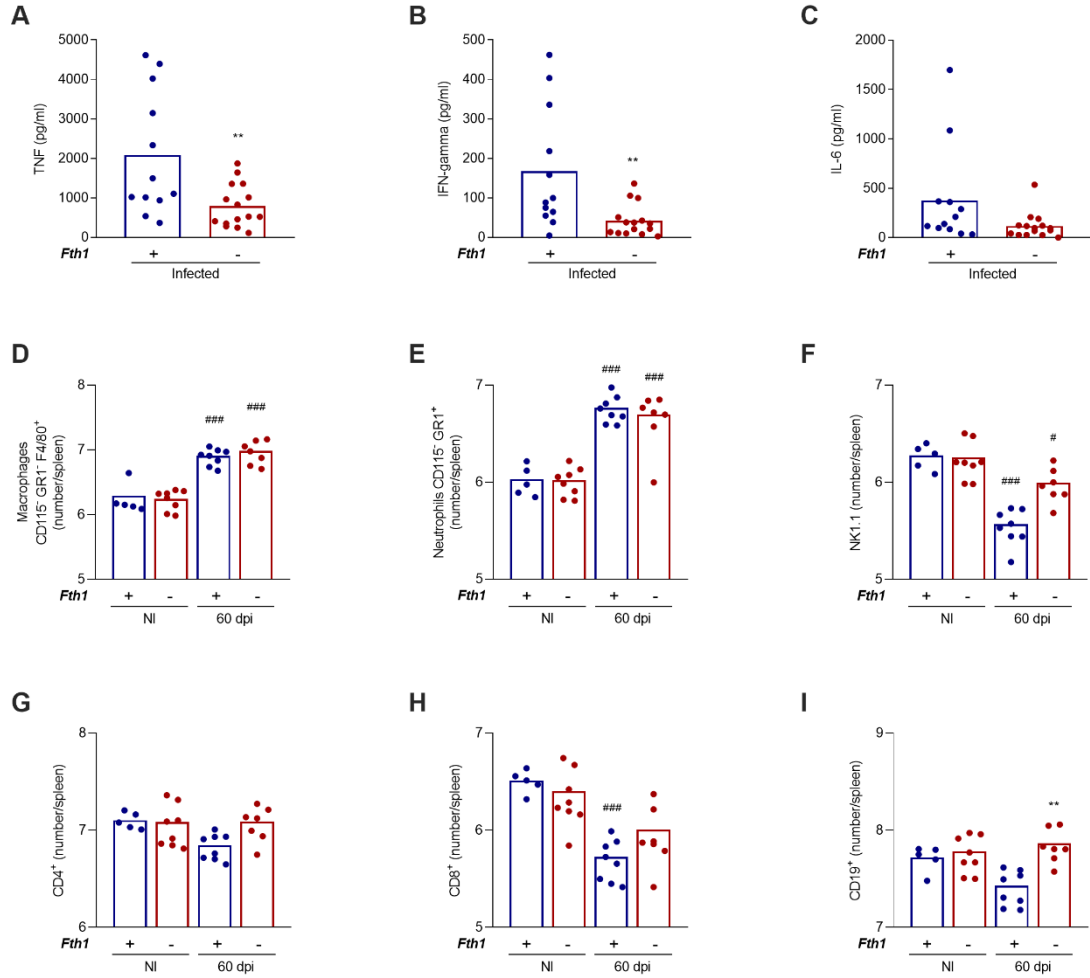

**Figure S2.** *Fth1*<sup>-/-</sup> mice have lower levels of inflammatory cytokines in circulation and spleen cell populations are not dependent of FTH1 expression. (a) TNF-alpha, (b) IFN-gamma, (c) IL-6 were measured in the serum of the mice from the survival curve, using a cytometric bead array mouse inflammation kit (N = 12 (*Fth1*<sup>+/+</sup>) or 16 (*Fth1*<sup>-/-</sup>)). (d-i) Number of macrophages (GR1-F4/80<sup>+</sup>), neutrophils (CD115-GR1<sup>+</sup>), NK1.1, CD4<sup>+</sup>, CD8<sup>+</sup>, CD19<sup>+</sup> CD19<sup>+</sup>, NK1.1, CF4<sup>+</sup>, CD8<sup>+</sup> cells in the spleen 60 days post infection (N=5 to 8). Bars represent the mean and the circles represent each animal. Statistical analysis was performed by two-way ANOVA with Sidak multiple comparison post hoc test. \*\*P<0.01 when comparing between genotypes, ###P<0.001 when assessing the effect of infection within the same genotype.

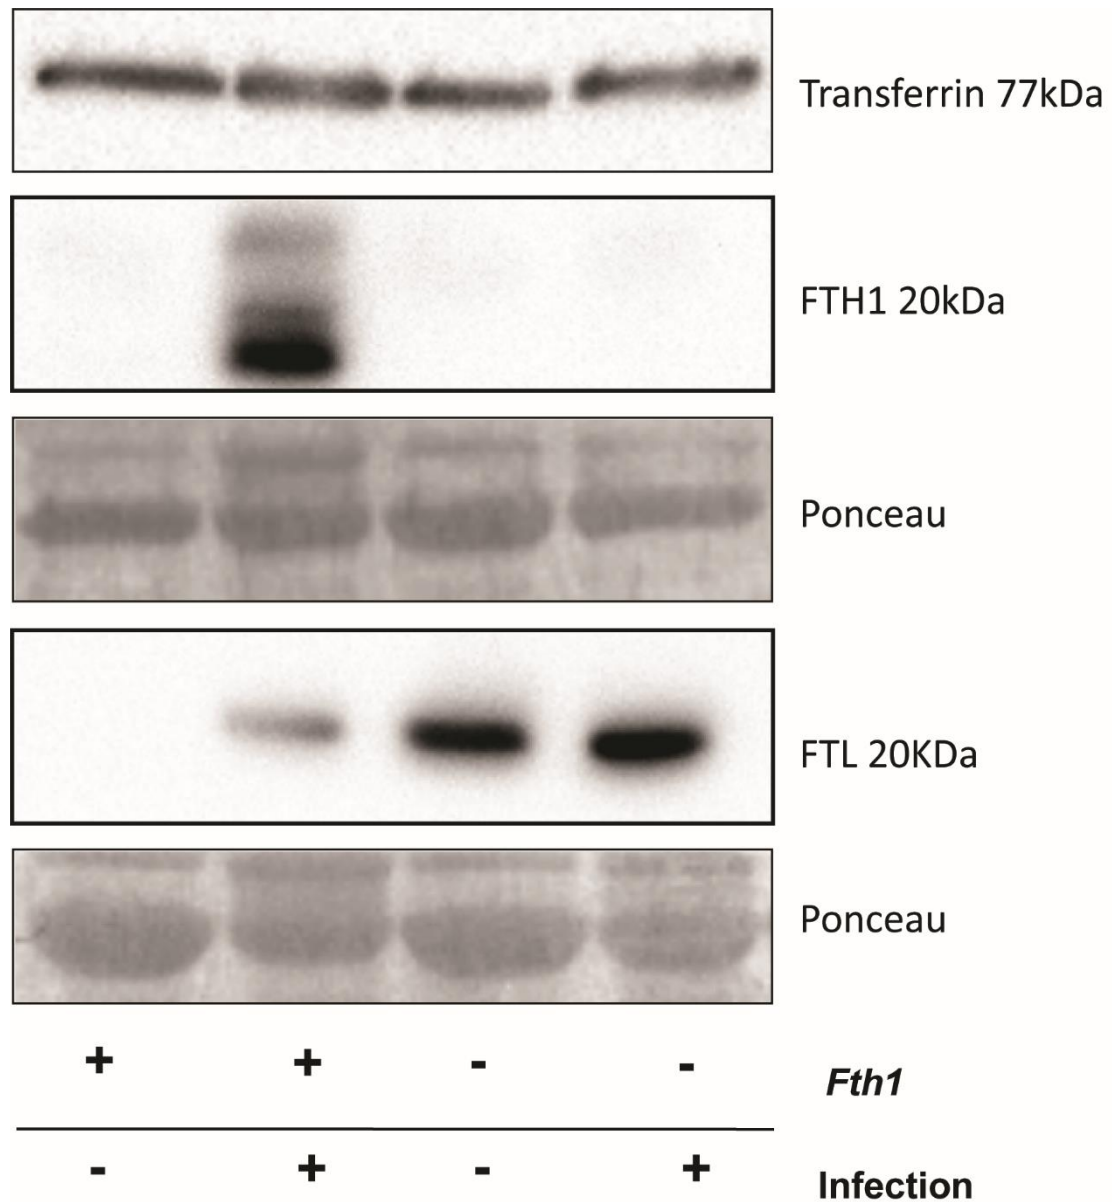

**Figure S3.** During *M. avium* infection, *Fth1*<sup>+/+</sup> mice have high amount of FTH1 in the serum. Western Blot against transferrin, FTH1 and FTL subunits. Ponceau staining was used to stain all proteins in the gel, as a confirmation that all lanes were loaded with equivalent amounts of protein.
